# Supplementary material
Source: Springer Nature journal article supplement (https://www.springermedizin.de/resource/supplementary/12936_2013_3152_MOESM4_ESM.pdf/9546286)
Supplement: MOESM4 [file 9546286]

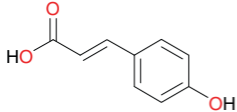

*p*-hydroxy-cinnamic acid (39)

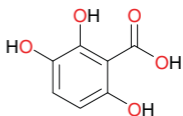

2,3,6-trihydroxy benzoic acid (40)

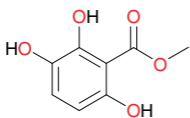

2,3,6-trihydroxy methyl benzoate (41)

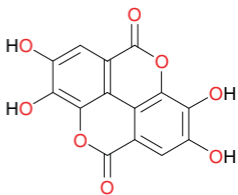

Ellagic acid (43)

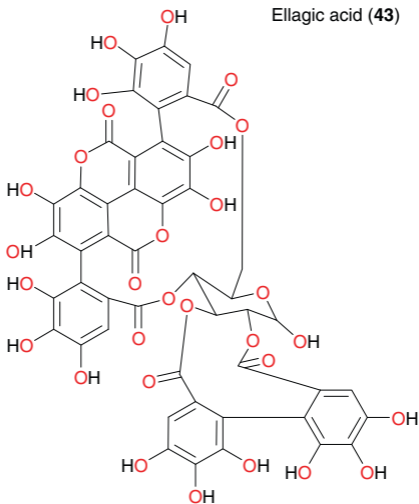

Punicalagin (42)

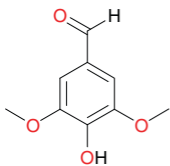

Syringaldehyde (44)

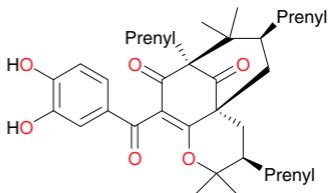

Isoxanthochymol (45)

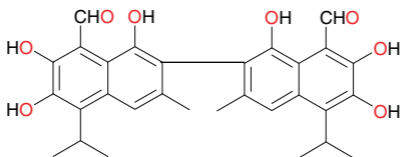

Gossypol (46)
